# Supplementary material
Source: publisher site journal article supplement (https://www.degruyterbrill.com/publication/isbn/9783805911917/downloadAsset/9783805911917_Inhaltsverzeichnis.pdf)
Supplement: Supplementary file 1 [file 9783805911917_Inhaltsverzeichnis.pdf]

# Inhaltsübersicht

|                                     | Seite * |
|-------------------------------------|---------|
| Allgemeines Schrifttum _____        | IX      |
| Buch 5 · Erbrecht                   |         |
| Abschnitt 7 · Erbverzicht _____     | 1       |
| Abschnitt 8 · Erbschein _____       | 247     |
| Abschnitt 9 · Erbschafts Kauf _____ | 571     |
| Sachregister _____                  | 665     |

---

\* Zitiert wird nicht nach Seiten, sondern nach Paragraph bzw Artikel und Randnummer; siehe dazu auch „Zitierweise“.
